# Supplementary material for: Melatonin treatment as an anti-aging therapy for UV-related degradation of perovskite solar cells
Source: Royal Society of Chemistry journal article supplement (doi:10.1039/d4ta01332h), 2024-01-01
Supplement: d4ta01332h1.pdf [file d4ta01332h1.pdf]

## Supporting information

### **Melatonin Treatment as an Anti-Aging Therapy for UV-Related Degradation of Perovskite Solar Cell**

Fei LIU<sup>a</sup>, Agnes VALENCIA<sup>a</sup>, Yuhua ZHU<sup>a</sup>, Xiangyang ZHANG<sup>a</sup>, Weilu LI<sup>a</sup> and Walid A. DAOUD<sup>a,\*</sup>

<sup>a</sup> Department of Mechanical Engineering, City University of Hong Kong, Tat Chee Avenue, Kowloon, Hong Kong.

\* E-mail: [wdaoud@cityu.edu.hk](mailto:wdaoud@cityu.edu.hk)

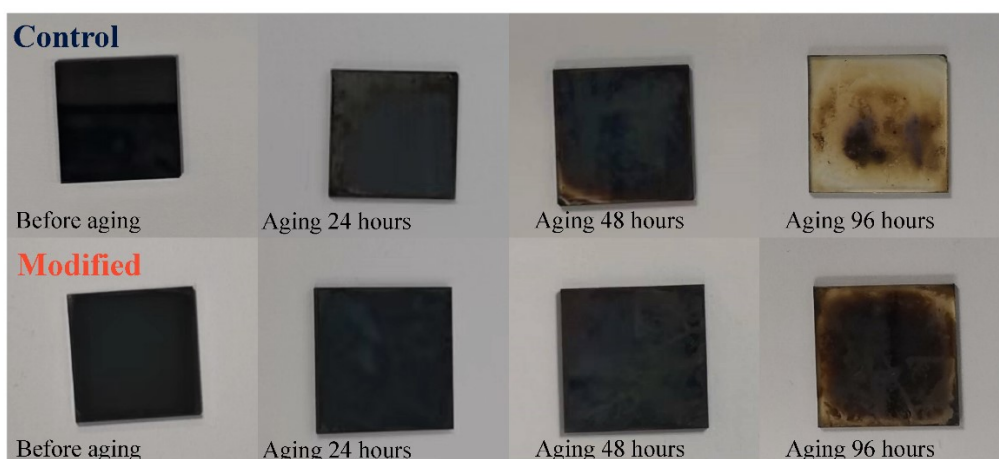

Figure S1. Photographs of the control and modified perovskite films under 365 nm UV irradiation in air at RH of 65% and temperature of 35°C.

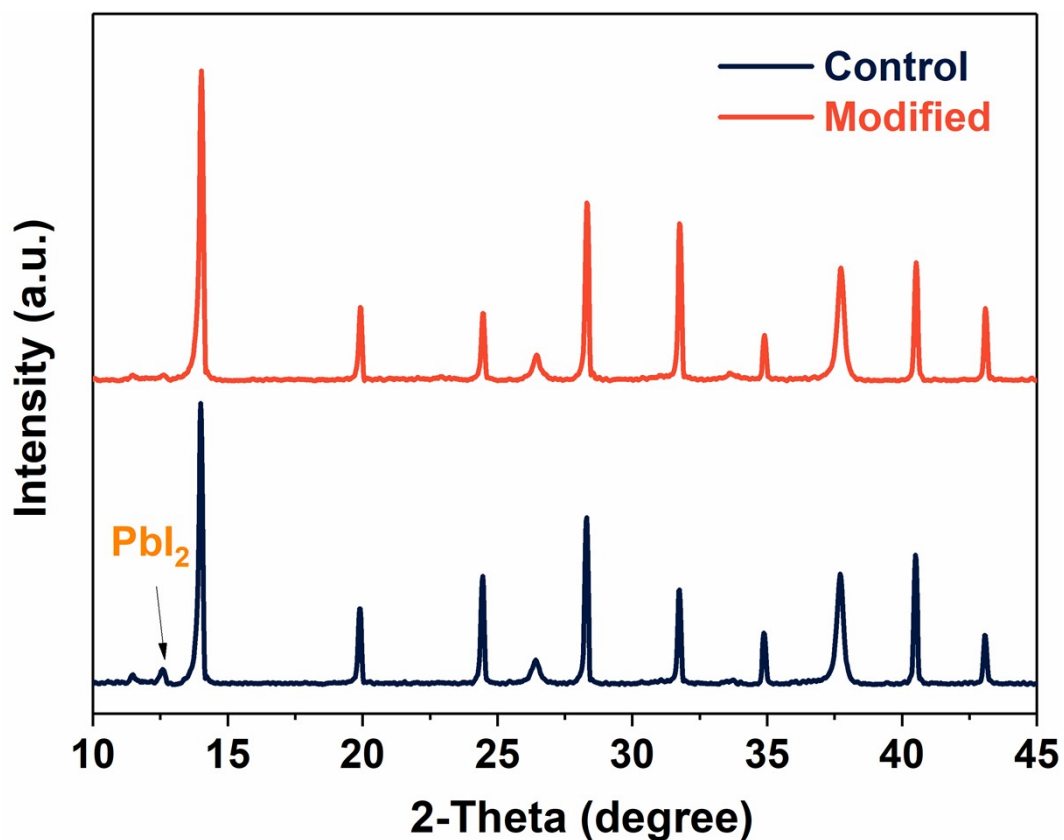

Figure S2. XRD patterns of the control and modified perovskite films.

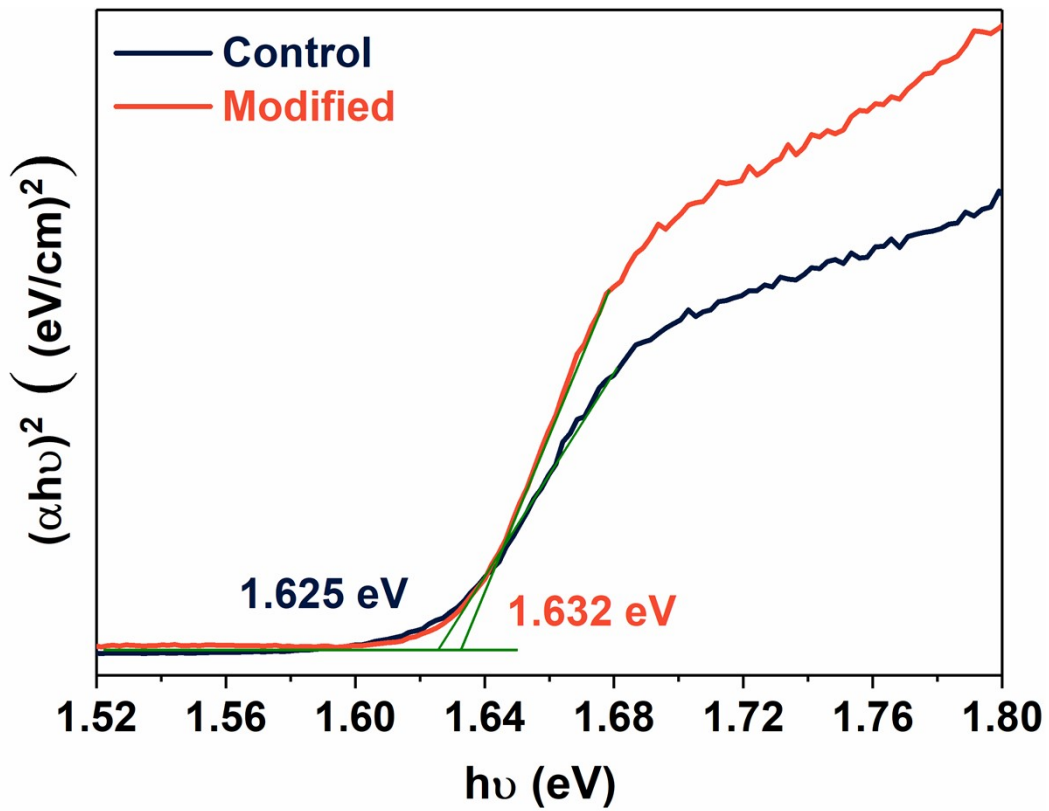

Figure S3. Tauc plots of the control and modified perovskite films.

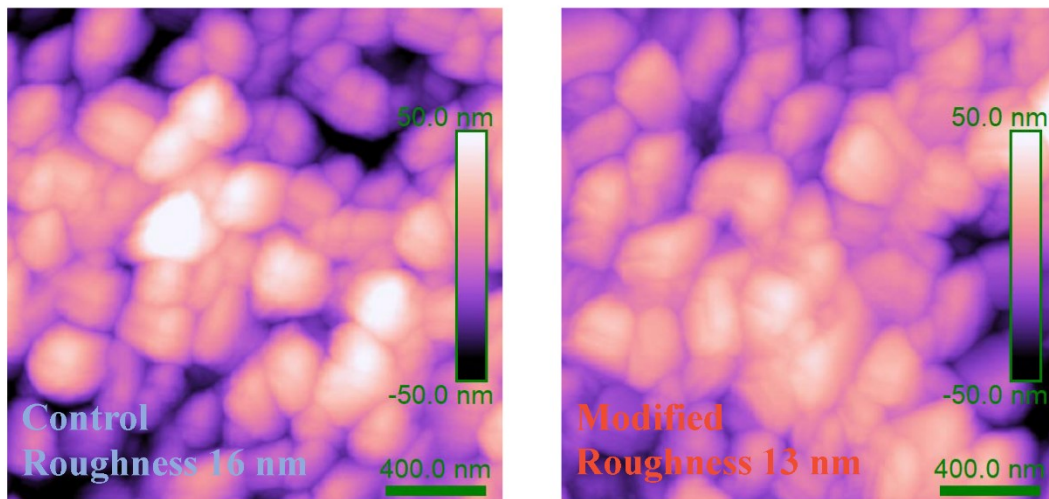

Figure S4. AFM images of the control and modified perovskite films.

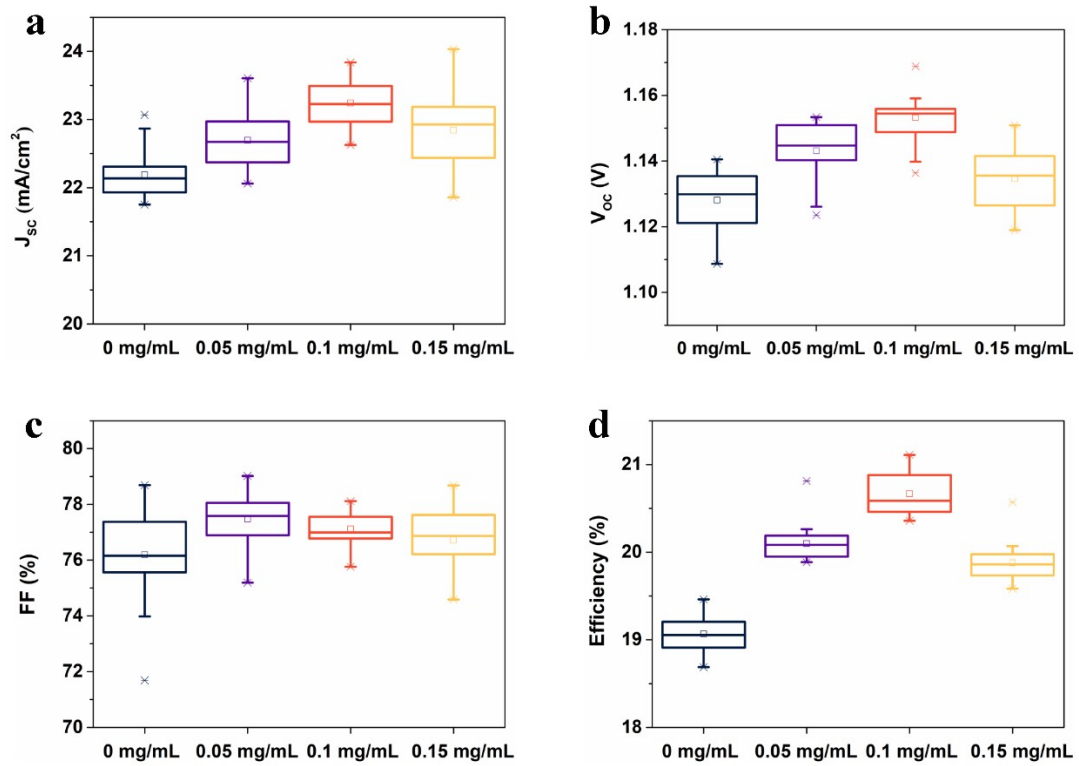

Figure S5. Statistical photovoltaic parameters of devices modified with different concentrations of melatonin.

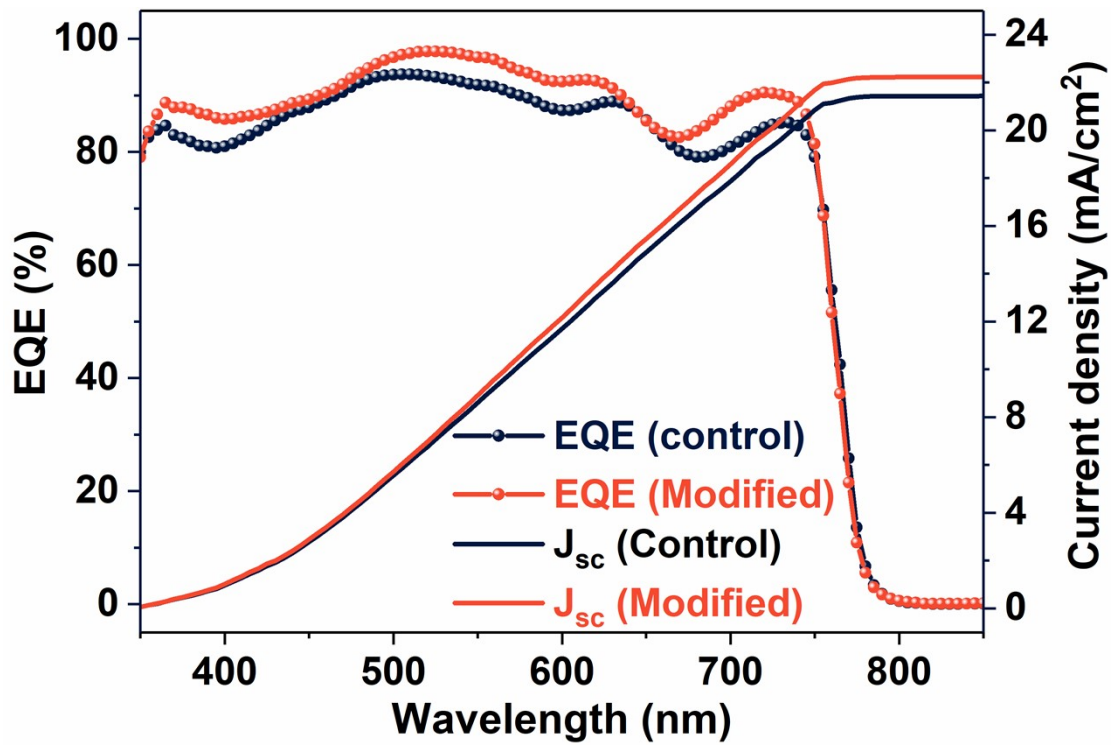

Figure S6. EQE spectra of the control and modified devices.

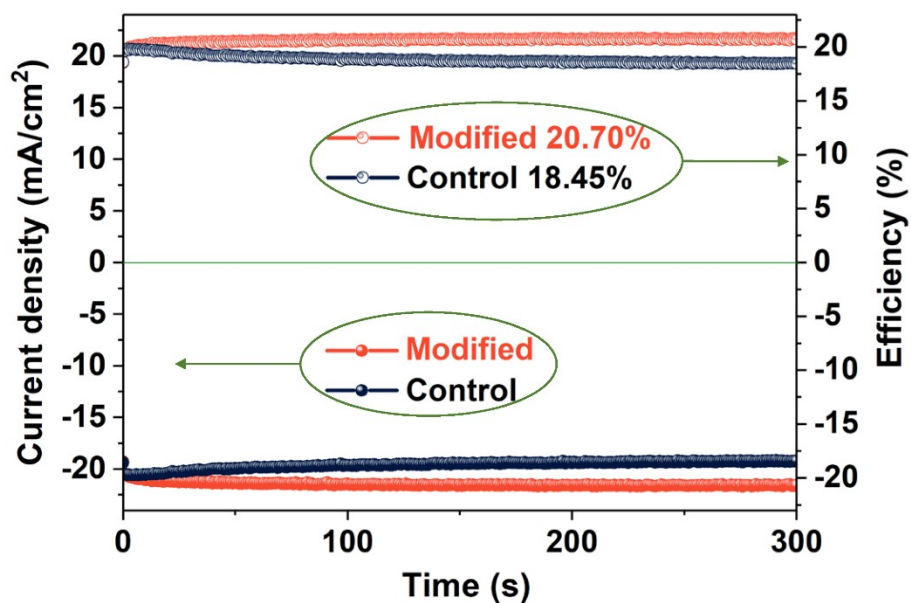

Figure S7. Steady-state current density and PCE of the control and modified devices measured under maximum power point.

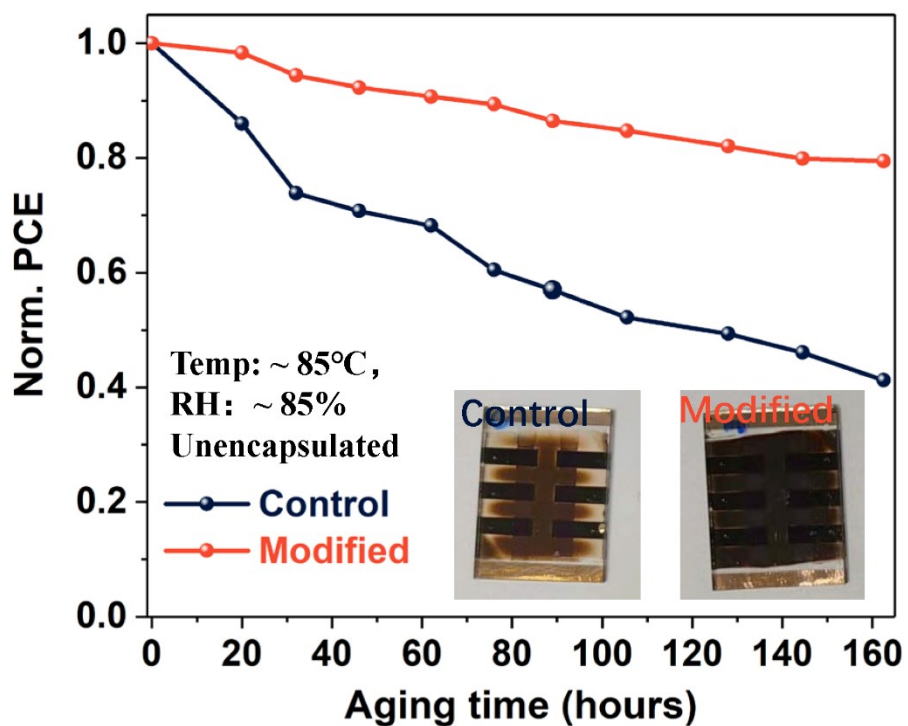

Figure S8. PCE decay of the control and modified devices at 85 °C and 85% humidity. Insets show the photographs of the control and modified devices after aging for 160 hours.

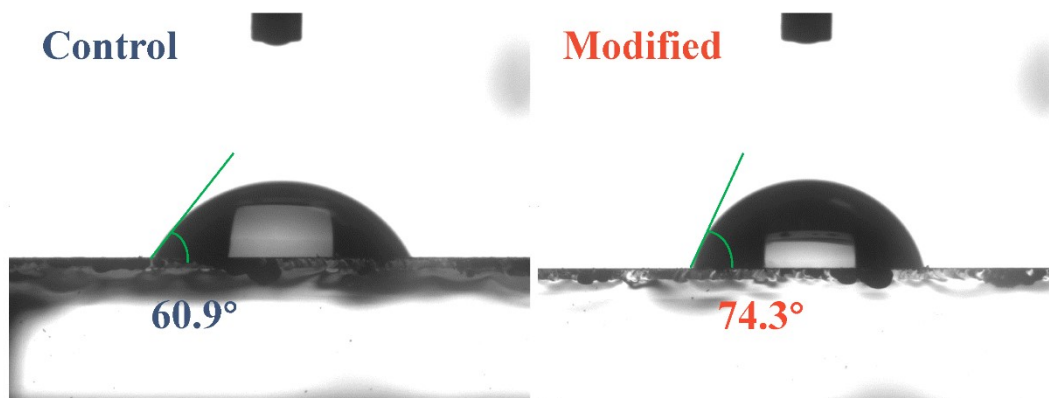

Figure S9. Water contact angle of control and modified perovskite film.

Table S1. Fitted TRPL parameters of different perovskite films on ITO glass.

|       | $A_1$  | $T_1$ (ns) | $A_2$  | $T_2$ (ns) | $\tau_{avg}$ (ns) |
|-------|--------|------------|--------|------------|-------------------|
| wo ME | 199.28 | 29.92      | 501.21 | 634.31     | 586               |
| w ME  | 195.08 | 15.93      | 797.68 | 1057.17    | 1020              |

Table S2. Photovoltaic parameters of modified PSCs at different concentration.

| Concentration of melatonin | $V_{oc}$ (V) | $J_{sc}$ (mA/cm <sup>2</sup> ) | FF (%) | PCE (%) |
|----------------------------|--------------|--------------------------------|--------|---------|
| 0 mg/mL                    | 1.142        | 22.69                          | 75.19  | 19.48   |
| 0.05 mg/mL                 | 1.152        | 23.61                          | 76.50  | 20.81   |
| 0.1 mg/mL                  | 1.168        | 23.56                          | 76.73  | 21.11   |
| 0.15 mg/mL                 | 1.12         | 24.03                          | 76.21  | 20.57   |
